# Anticipating emerging arboviruses: What comes after Zika?

Michelle V. Evans<sup>1,2\*</sup>, Courtney C. Murdock<sup>1,2,3,4,5,6</sup>, John M. Drake<sup>1,2</sup>

**1** Odum School of Ecology, University of Georgia, Athens, GA, USA

**2** Center for the Ecology of Infectious Diseases, University of Georgia, Athens, GA, USA

**3** Department of Infectious Disease, University of Georgia, Athens, GA, USA

**4** Center for Tropical Emerging Global Diseases, University of Georgia, Athens, GA, USA

**5** Center for Vaccines and Immunology, University of Georgia, Athens, GA, USA

**6** River Basin Center, University of Georgia, Athens, GA, USA

\*Corresponding Author: [mvevans@uga.edu](mailto:mvevans@uga.edu)

**Abstract:** New vector-borne diseases have emerged on multiple occasions over the last several decades, raising fears that they may become established within the United States. Here, we provide a watchlist of flaviviruses with high potential to emerge in the US, identified using new statistical techniques for mining the associations in partially observed data, to allow the public health community to better target surveillance.

The start of the 21st century was marked by multiple emerging mosquito-borne diseases. West Nile virus was introduced to the eastern United States in 1999 and has since spread across the continental US, infecting tens of thousands of people and causing widespread mortality in bird populations (Hayes et al. 2005). A mutation in a strain of chikungunya virus increased that pathogen's infectiousness in the invasive mosquito vector, *Aedes albopictus* (Asian tiger mosquito), leading to an expansion of the virus's range from eastern Africa to Asia, and increasing the risk of disease transmission in temperate zones (Pialoux et al. 2007, Weaver and Forrester 2015). More recently, Zika virus has spread from Oceania to South America, and continued north at a rate exceeding 15,000 km/year (Zinszer et al. 2017), causing severe neurological diseases including infant microcephaly and Guillain-Barré syndrome (Lessler et al. 2016). In each case, the science and public health communities lacked basic knowledge about these previously geographically-limited diseases, and interventions were put in place only after the disease had become established. Our question is not *if* another mosquito-borne disease will emerge in the United States, but which will be next?

20 The sheer number of potential emerging pathogens underscores the infeasibility of comprehen-  
21 sive surveillance. Of over 530 known arboviruses that infect humans or domestic animals (Centers  
22 for Disease Control and Prevention 2016), most are poorly studied and knowledge gaps include  
23 information as basic as the species of mosquitoes that transmit the pathogen. Without a complete  
24 list of possible vectors, health agencies are unable to adequately plan for outbreaks or target virus  
25 surveillance. It is also difficult to predict whether an imported case of disease will initiate local  
26 transmission without knowing the efficiency at which mosquito species in the area can transmit the  
27 virus. Unfortunately, the development of diagnostic tools and vector competence studies (which  
28 are very labor intensive (Hardy et al. 1983) are often undertaken only after disease is endemic.  
29 But, without this information, health agencies are ill-equipped to prevent outbreaks.

30 To narrow the list of potential emerging diseases, we created a ‘watch list’ of flaviviruses (the  
31 family that includes well known arboviruses such as West Nile, dengue, yellow fever and Zika  
32 viruses) that might emerge in the United States. Our list is based on known associations of  
33 flaviviruses with mosquito species currently found in the US. Drawing on traits of known vector-  
34 virus pairs, in recent work, we developed a statistical model of trait combinations associated with  
35 the propensity of mosquito and virus species to form linked pairs (Evans et al. 2017). Known links  
36 were compiled from the literature on experiments showing which mosquito species can transmit  
37 the virus from an infected to a susceptible host. Fifteen traits of mosquitoes and twelve traits of  
38 viruses (e.g. geographic range, larval habitat, disease severity) were used to construct a predictive  
39 model. We then applied the resulting model to data on all the flaviviruses known to infect humans  
40 and the mosquito species found in the US.

41 The resulting network of potential virus-vector pairs in the United States (Fig. 1) contains  
42 thirty-seven mosquito species and twenty viruses, only five of which are currently or historically  
43 found in the US. Two viruses, Japanese encephalitis virus and Wesselsbron virus, have many more  
44 predicted links than the other viruses (36 and 29, respectively). Closely related to West Nile  
45 Virus, Japanese encephalitis virus infects over 67,000 people annually, with the majority of cases  
46 in Asia (Campbell et al. 2011). While only 1% of cases develop Japanese encephalitis, there is a  
47 20 - 30% mortality rate among cases that progress to that stage (Kaur and Vрати 2003). Japanese

48 encephalitis virus requires a non-human host to amplify the virus, domestic pigs, in its native Asia,  
49 but there are bird species in North America that are competent reservoirs for the virus (Nemeth  
50 et al. 2012). Much less is known about Wesselsbron virus, which has been historically restricted to  
51 a small geographic region of sub-Saharan Africa where it most commonly infects sheep and other  
52 livestock (Van Regenmortel et al. 2000). While symptoms of Wesselsbron virus in humans are  
53 relatively mild, it causes abortion in goats (Mushi et al. 1998) and cerebellar hypoplasia (a form  
54 of microcephaly) in calves (Coetzer et al. 1979) – a significant concern for the livestock industry.

55 The virus with the most predicted links is West Nile virus (37 links). Other US-endemic  
56 viruses have between three and 34 predicted mosquito vectors. Yellow fever virus, which caused  
57 an outbreak in New Orleans as recently as 1905 (Crosby 2007), has a predicted 34 mosquito  
58 vectors. Since the introduction of the yellow fever vaccine in the mid-20th century, transmission  
59 has been mostly restricted to the African continent (Frierson 2010), however, the 2016 epidemic  
60 in Angola demonstrates the inadequacy of current immunization regulations (Barrett 2016). By  
61 contrast, dengue virus, which is locally transmitted in Puerto Rico and the Gulf Coast, is only  
62 predicted to be vectored by three mosquito species endemic to the United States. Despite the  
63 small number of competent vector species, there were nonetheless an estimated 100,000 dengue  
64 cases in the continental US in recent years (Hotez 2008). The high number of cases highlights  
65 the importance of the identity of predicted vectors on disease transmission, in this case, *Aedes*  
66 *aegypti*, a mosquito species that is well-adapted to live with humans and is a highly efficient vector  
67 of many human pathogens (Powell and Tabachnick 2013).

68 These viruses illustrate, but do not exhaust, the risk of emergence posed by viruses circulating  
69 elsewhere in the world. With the rise in globalization and availability of air transportation, a  
70 mosquito-borne pathogen can travel across the world in less than 24 hours, connecting countries  
71 with active transmission to countries without disease (e.g. Zika and chikungunya (Escobar et al.  
72 2016)). While several states have large mosquito surveillance programs, most do not (Hamer 2016),  
73 and the accompanying virus surveillance programs screen for a limited number of pathogens. The  
74 emergence of Zika virus in the United States, and the corresponding scramble to control its spread  
75 (Halford 2016, Tinsley 2016), highlights the need to shift from reactive to proactive surveillance

76 and control strategies for mosquito-borne diseases (Olival and Willoughby 2017). Focusing on the  
77 viruses with a high potential to emerge could improve the efficiency and reliability of surveillance  
78 without overly burdening public health institutions and help guide future vaccine development,  
79 such as the Coalition for Epidemic Preparedness Innovations (Butler 2017). Finally, the approach  
80 we present here can be applied to other disease systems to identify groups of viruses and bacterial  
81 pathogens most likely to emerge in the United States or any other country.

## 82 References

- 83 Barrett, A. D. 2016. Yellow Fever in Angola and Beyond — The Problem of Vaccine Supply and  
84 Demand. *N. Engl. J. Med.* **375**:301–303.
- 85 Butler, D. 2017. Billion-Dollar Project Aims to Prep Vaccines before Epidemics Hit. *Nature News*  
86 **541**:444.
- 87 Campbell, G. L., S. L. Hills, M. Fischer, J. A. Jacobson, C. H. Hoke, J. M. Hombach, A. A. Marfin,  
88 T. Solomon, T. F. Tsai, V. D. Tsu, and A. S. Ginsburg. 2011. Estimated Global Incidence of  
89 Japanese Encephalitis: A Systematic Review. *Bull World Health Organ* **89**:766–774E.
- 90 Centers for Disease Control and Prevention. 2016. International Catalog of Arboviruses Including  
91 Certain Other Viruses of Vertebrates .
- 92 Coetzer, J. A., A. Theodoridis, S. Herr, and L. Kritzinger. 1979. Wesselsbron Disease: A Cause  
93 of Congenital Porencephaly and Cerebellar Hypoplasia in Calves. *Onderstepoort J. Vet. Res.*  
94 **46**:165–169.
- 95 Crosby, M. C. 2007. *The American Plague: The Untold Story of Yellow Fever, The Epidemic*  
96 *That Shaped Our History*. 1st reprint edition edition. Berkley.
- 97 Escobar, L. E., H. Qiao, and A. T. Peterson. 2016. Forecasting Chikungunya Spread in the  
98 Americas via Data-Driven Empirical Approaches. *Parasites & Vectors* .
- 99 Evans, M., T. A. Dallas, B. A. Han, C. C. Murdock, and J. M. Drake. 2017. Data-Driven  
100 Identification of Potential Zika Virus Vectors. *eLife* .
- 101 Frierson, J. G. 2010. The Yellow Fever Vaccine: A History. *Yale J Biol Med* **83**:77–85.
- 102 Halford, B. 2016. Scientists Scramble To Develop Tools, Treatments For Zika Virus. *Chemical*  
103 *and Engineering News* **94**.

- 104 Hamer, G. L. 2016. Heterogeneity of Mosquito (Diptera: Culicidae) Control Community Size, Re-  
105 search Productivity, and Arboviral Diseases Across the United States. *J Med Entomol* **53**:485-  
106 495.
- 107 Hardy, J. L., E. J. Houk, L. D. Kramer, and W. C. Reeves. 1983. Intrinsic Factors Affecting  
108 Vector Competence of Mosquitoes for Arboviruses. *Annu. Rev. Entomol.* **28**:229-262.
- 109 Hayes, E. B., N. Komar, R. S. Nasci, S. P. Montgomery, D. R. OLeary, and G. L. Campbell.  
110 2005. Epidemiology and Transmission Dynamics of West Nile Virus Disease. *Emerg. Infect.*  
111 *Dis.* **11**:1167-1173.
- 112 Hotez, P. J. 2008. Neglected Infections of Poverty in the United States of America. *PLoS Negl*  
113 *Trop Dis* **2**:e256-11.
- 114 Kaur, R., and S. Vрати. 2003. Development of a Recombinant Vaccine against Japanese Encephali-  
115 tis. *Journal of NeuroVirology* **9**:421-431.
- 116 Lessler, J., L. H. Chaisson, L. M. Kucirka, Q. Bi, K. Grantz, H. Salje, A. C. Carcelen, C. T.  
117 Ott, J. S. Sheffield, N. M. Ferguson, D. A. T. Cummings, C. J. E. Metcalf, and I. Rodriguez-  
118 Barraquer. 2016. Assessing the global threat from Zika virus. *Science* .
- 119 Mushi, E. Z., M. G. Binta, and M. Raborokgwe. 1998. Wesselsbron Disease Virus Associated with  
120 Abortions in Goats in Botswana. *J. Vet. Diagn. Invest.* **10**:191.
- 121 Nemeth, N., A. Bosco-Lauth, P. Oesterle, D. Kohler, and R. Bowen. 2012. North American Birds  
122 as Potential Amplifying Hosts of Japanese Encephalitis Virus. *Am J Trop Med Hyg* **87**:760-767.
- 123 Olival, K. J., and A. R. Willoughby. 2017. Prioritizing the ‘Dormant’ Flaviviruses. *EcoHealth* .
- 124 Pialoux, G., B.-A. Gaüzère, S. Jauréguiberry, and M. Strobel. 2007. Chikungunya, an Epidemic  
125 Arbovirosis. *The Lancet Infectious Diseases* **7**:319-327.
- 126 Powell, J. R., and W. J. Tabachnick. 2013. History of Domestication and Spread of *Aedes Aegypti*  
127 - A Review. *Mem Inst Oswaldo Cruz* **108**:11-17.

128 Tinsley, E. 2016. As Zika Spreads, Scientists Scramble to Understand the Disease. International  
129 Center for Journalists .

130 Van Regenmortel, M. H. V., C. M. Fauquet, and D. H. L. Bishop. 2000. Virus Taxonomy :  
131 Classification and Nomenclature of Viruses : Seventh Report of the International Committee  
132 on Taxonomy of Viruses. San Diego : Academic Press.

133 Weaver, S. C., and N. L. Forrester. 2015. Chikungunya: Evolutionary History and Recent Epidemic  
134 Spread. *Antiviral Res.* **120**:32–39.

135 Zinszer, K., Kathryn Morrison, John S Brownstein, Fatima Marinho, Alexandre F Santos, and  
136 Elaine O Nsoesie. 2017. Reconstruction of Zika Virus Introduction in Brazil. *Emerging Infectious  
137 Disease* **23**.

## Figures



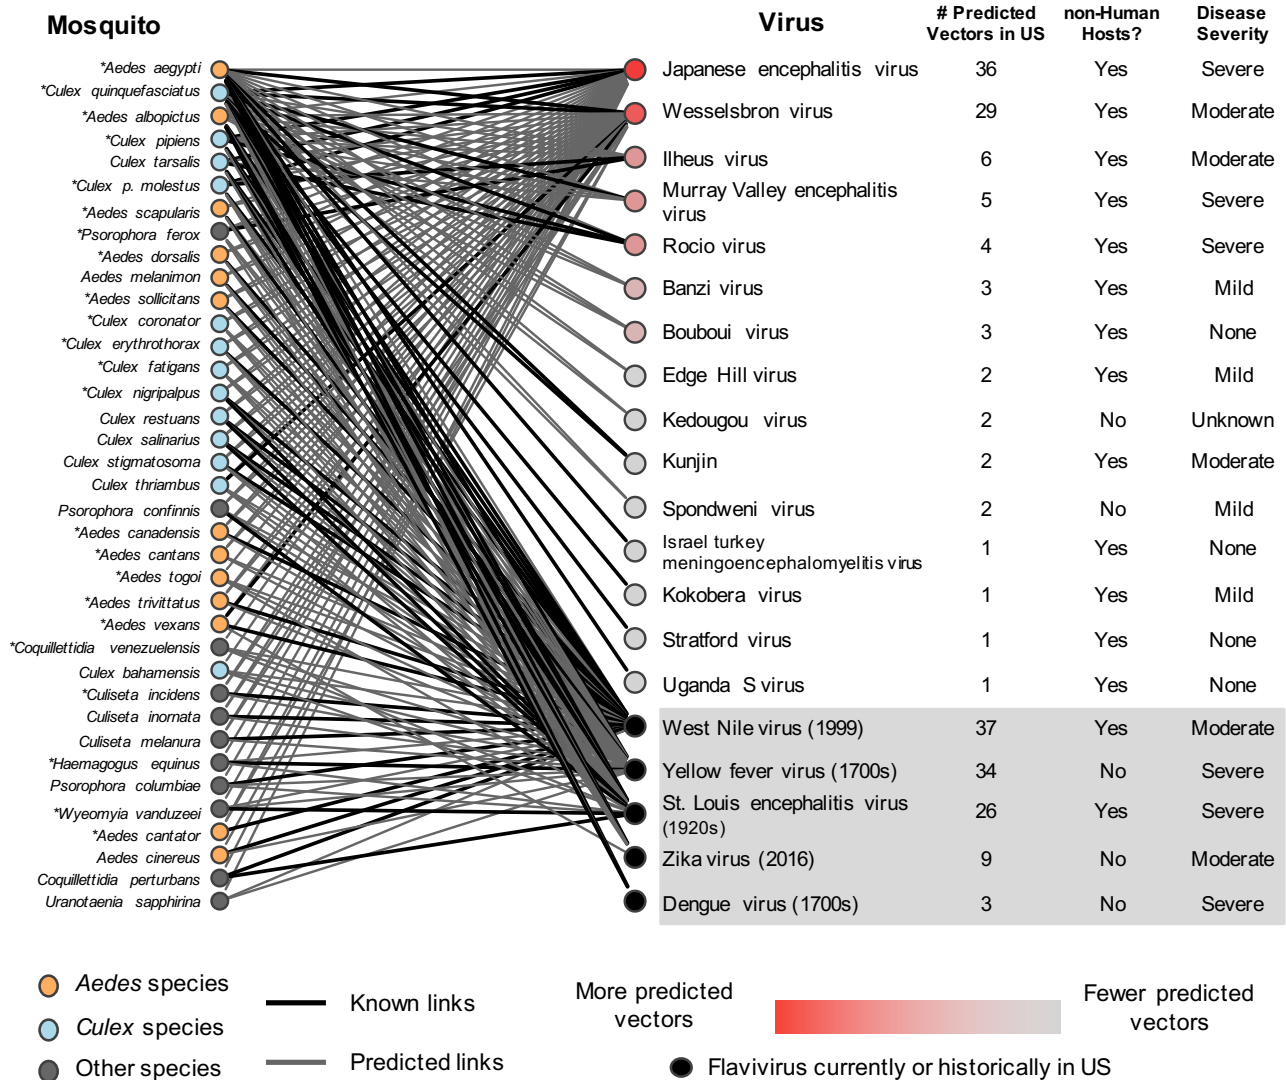

Figure 1: Network of flaviviruses known (black) or predicted (grey) to be transmitted by mosquito species found in the United States. Starred mosquitoes readily bite humans. Mosquitoes and viruses are rank ordered from top to bottom by the total number of possible links. Viruses that are currently or historically in the United States are shown in the gray box, with their approximate year of introduction, or first known case, in parentheses.
